# Supplementary material for: Molecular basis for histidine N3-specific methylation of actin H73 by SETD3
Source: PubMed Central journal article supplement (PMC6971037; doi:10.1038/s41421-019-0135-5), 2020-01-21
Supplement: 41421_2019_135_MOESM1_ESM.pdf [file 41421_2019_135_MOESM1_ESM.pdf]

# 1 **Supplementary information**

## 2 **Materials and methods**

### 3 **Protein expression and purification**

4 Wild type and mutant full length human SETD3 (residue 1-497) was cloned into a pSUMOH10  
5 vector (an in house modified SUMO tag vector based on pET28b) containing an N-terminal  
6 10×His-SUMO tag. The recombinant SETD3<sub>1-497</sub> was overexpressed in *E. coli* BL21 (DE3)  
7 strain induced by 0.2 mM isopropyl β-D-thiogalactoside (IPTG) at 16°C overnight. Cells were  
8 harvested and suspended in lysis buffer containing 20 mM Tris, pH 8.0, 250 mM NaCl, 5%  
9 glycerol and 20 mM imidazole. After cell lysis and centrifugation, SETD3<sub>1-497</sub> was affinity-  
10 purified by a HisTrap column and eluted with a continuous gradient from 20 to 500 mM  
11 imidazole and then the 10×His-SUMO tag was cleaved by ULP1 overnight at 4°C which was  
12 further removed by reloading onto the HisTrap column. SETD3<sub>1-497</sub> was then purified by an  
13 anion exchange column (HiTrap Q HP, GE Healthcare) and finally polished by size-exclusion  
14 chromatography on a Superdex 200 10/300 GL column (GE Healthcare) in buffer containing  
15 20 mM Tris, pH 8.0, 150 mM NaCl.

### 16 **Crystallization, data Collection and structure determination**

17 For crystallization of the SETD3<sub>1-497</sub>-SFG-Actin peptide (60-81) ternary complex, the protein  
18 sample was prepared by directly mixing protein with Sinefungin (SFG, a SAM analogue) and  
19 actin peptide (60-81) in a molar ratio of 1:10:20 for overnight at 4°C before crystallization.  
20 The ternary complex was grown at 18°C by mixing equal volumes of the protein sample with  
21 the reservoir solution using the sitting-drop vapor diffusion method. The crystal was grown in

22 a reservoir solution containing 0.1 M Hepes-Na, pH 7.5, 0.2 M ammonium sulfate, 20%(w/v)  
23 PEG8000, 10%(v/v) 2-propanol.

24 The diffraction data set was collected at the beamline BL17U of the Shanghai  
25 Synchrotron Radiation Facility. All diffraction images were indexed, integrated and merged  
26 using HKL2000 software packages<sup>1</sup>. The structure was determined by molecular  
27 replacement using the MolRep program with the free structure of human SETD3 (PDB code:  
28 3SMT) as the search model. Structural refinement was carried out using PHENIX<sup>2</sup>, and  
29 iterative model building was performed with COOT<sup>3</sup>. Detailed structural refinement statistics  
30 are in Table S1. Structural figures were generated using the PYMOL ([http:// www.pymol.org/](http://www.pymol.org/))  
31 or Chimera (<http://www.cgl.ucsf.edu/chimera>) programs.

### 32 **Isothermal titration calorimetry**

33 All calorimetric experiments in this study were performed at 25°C using a MicroCal iTC200  
34 instrument (GE Healthcare). Before ITC titration, SETD3<sub>1-497</sub> was incubated with SFG or SAH  
35 in a molar ratio of 1:10 at 4°C for 1 hour. The sample containing 200 µL of 50 µM protein was  
36 titrated with 17 successive injection of 1 mM peptide. Acquired calorimetric titration curves  
37 were analyzed using Origin 7.0 (OriginLab) using the “One Set of Binding Sites” fitting model.

### 38 ***In vitro* methyltransferase assay**

39 The reaction was carried out in a 50 µL volume containing 10 µM purified wild type or mutant  
40 SETD3<sub>1-497</sub>, 100 µM actin peptide, 500 µM SAM and 20 mM Tris, pH 8.0. The reaction was  
41 performed at 37°C for 10 hours and terminated by adding 0.1% TFA and then was subjected  
42 for LC-MS quantification.

43

44 **Reference**

- 45 1. Otwinowski, Z. & Minor, W. Processing of X-ray diffraction data collected in oscillation  
46 mode. *Methods Enzymol.* **276**, 307–326 (1997).
- 47 2. Adams, P. D. *et al.* PHENIX: a comprehensive Python-based system for macromolecular  
48 structure solution. *Acta Crystallogr. D Biol. Crystallogr.* **66**, 213–221 (2010).
- 49 3. Emsley, P. & Cowtan, K. Coot: model-building tools for molecular graphics. *Acta*  
50 *Crystallogr. D Biol. Crystallogr.* **60**, 2126–2132 (2004).

51

52 **Supplementary Table S1**

53

54

**Data collection and refinement statistics**

55

|                                          |                                               |
|------------------------------------------|-----------------------------------------------|
| Crystal                                  | SETD3-Actin-SFG                               |
| <b>Data Collection</b>                   |                                               |
| Space group                              | P2 <sub>1</sub> 2 <sub>1</sub> 2 <sub>1</sub> |
| <b>Unit Cell</b>                         |                                               |
| <i>a</i> , <i>b</i> , <i>c</i> (Å)       | 60.4, 131.3, 175.2                            |
| $\alpha$ , $\beta$ , $\gamma$ (°)        | 90, 90, 90                                    |
| Resolution (Å)                           | 50-2.70 (2.76-2.70)                           |
| No. of unique reflections                | 38,336 (2499)                                 |
| R <sub>sym</sub> (%)                     | 16.2 (85.5)                                   |
| R <sub>pim</sub> /CC1/2 (%)              | 5.5 (29.7)/98.2 (83.9)                        |
| I/ $\sigma$ (I)                          | 13.2 (1.8)                                    |
| Completeness (%)                         | 99.8 (99.8)                                   |
| Redundancy                               | 9.7 (9.2)                                     |
| <b>Refinement (F&gt;0)</b>               |                                               |
| Resolution (Å)                           | 50-2.7                                        |
| No. of unique reflections                | 38,266                                        |
| R <sub>work</sub> /R <sub>free</sub> (%) | 20.0/24.3                                     |
| <b>No. of non-H atoms</b>                |                                               |
| Protein                                  | 7,694                                         |
| Peptide                                  | 263                                           |
| Water                                    | 84                                            |
| SFG/Buffer ions                          | 54/40                                         |
| <b>Average B-factors (Å<sup>2</sup>)</b> |                                               |
| Protein                                  | 46.4                                          |
| Peptide                                  | 45.7                                          |
| Water                                    | 41.4                                          |
| SFG/Buffer ions                          | 34.0/56.1                                     |
| RMSD bonds (Å)                           | 0.005                                         |
| RMSD angle (°)                           | 0.705                                         |
| PDB entry code                           | 6JAT                                          |

58

59

60

71 **Supplementary Table S2.**

72 **Sequence of  $\beta$ -actin peptide used in this paper**

| <b>Peptide Name</b> | <b>Sequence</b>        |
|---------------------|------------------------|
| Actin (60-81)       | SKRGILTLKYPIEHGIITNWDD |
| Actin (60-81) H73A  | SKRGILTLKYPIEAGIITNWDD |
| Actin (66-78)       | TLKYPIEHGIITN          |
| Actin (66-78) I71L  | TLKYPLEHGIITN          |
| Actin (66-78) I71M  | TLKYPMEHGIITN          |
| Actin (66-78) I71A  | TLKYPAEHGIITN          |
| Actin (66-78) I71D  | TLKYPDEHGIITN          |
| Actin (66-78) I71K  | TLKYPKEHGIITN          |

73

74

75

76

77

78

79

80

81

82

83

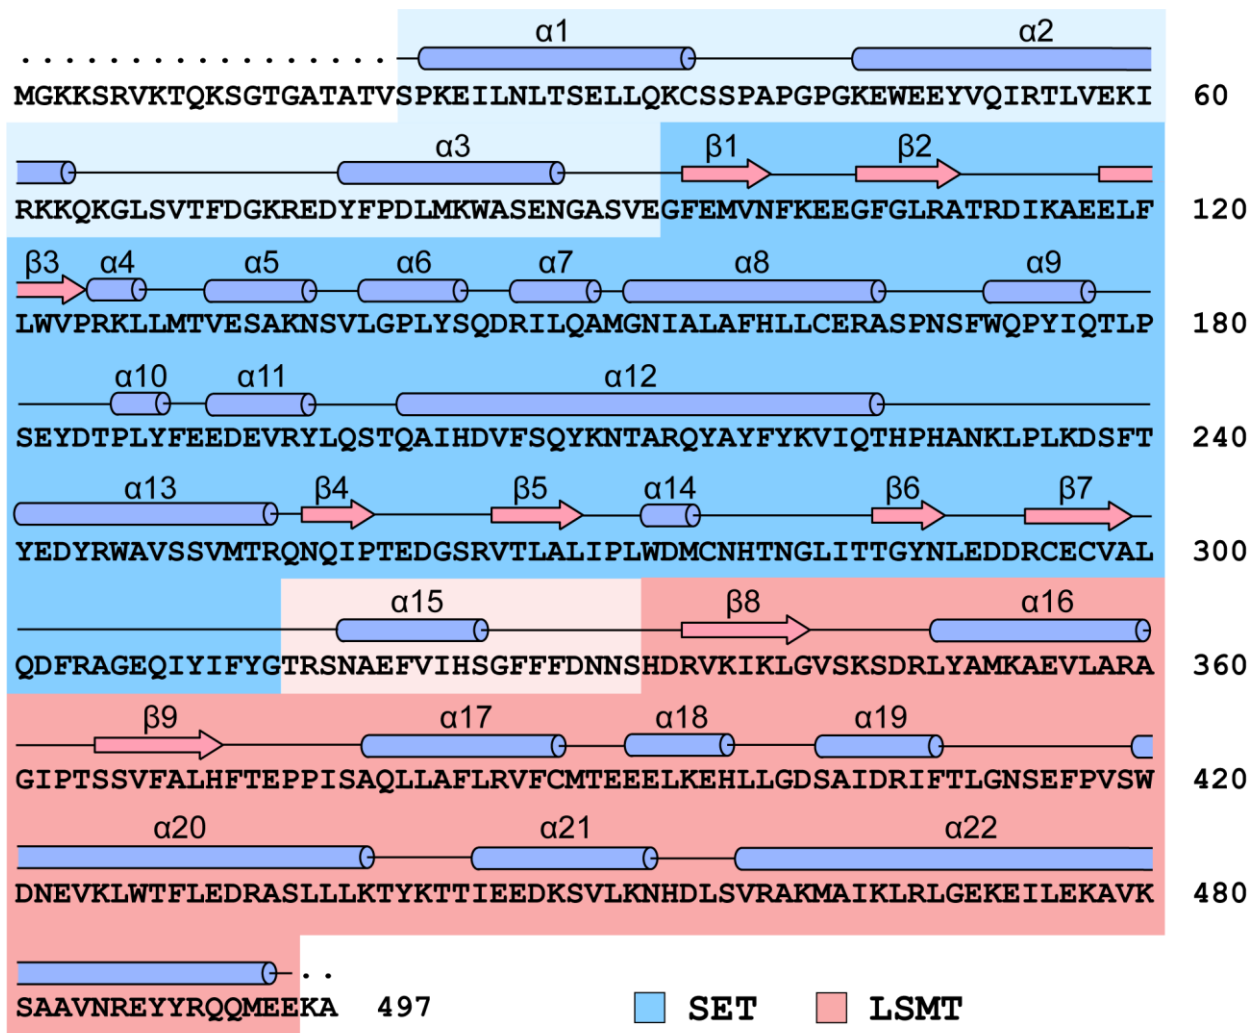

84

85 **Supplementary Fig. S1 Structural based secondary structure assignment.**

86 α helices and β strands are colored blue and salmon, respectively. SET domain and Rubisco

87 LSMT binding domain are shaded by the denoted box color. Invisible residues in the structure

88 are denoted by dots.

89

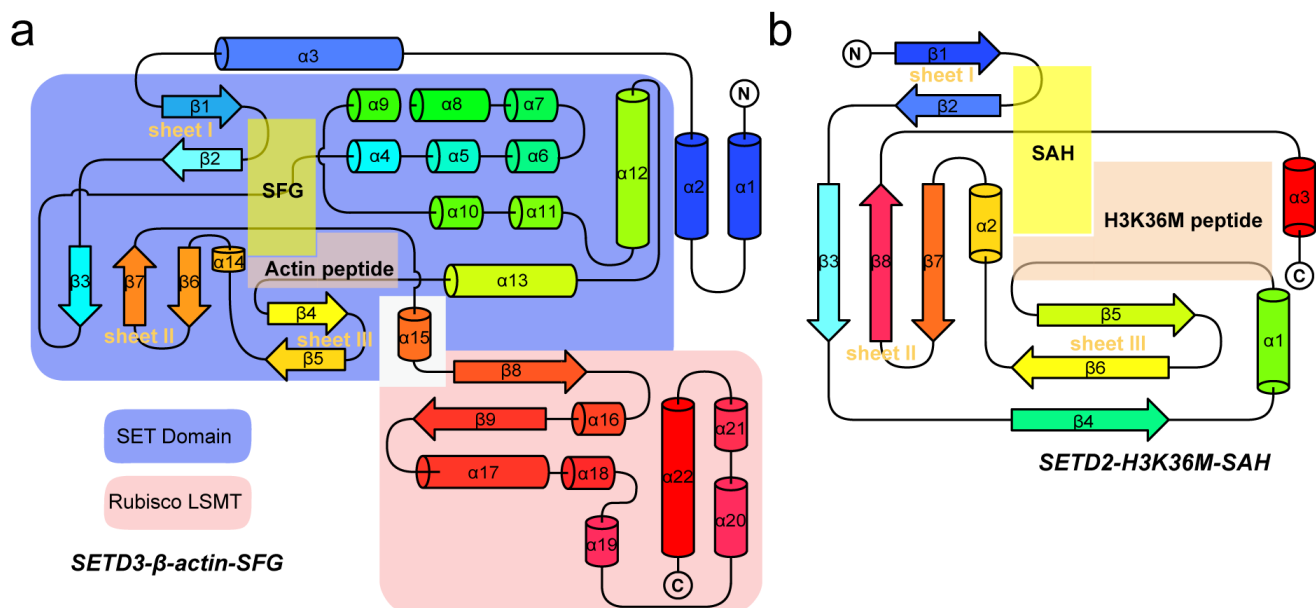

90

91

92 **Supplementary Fig. S2 Topology of SETD3 and SED2.**

93 **a** Topology diagram of ternary complex SETD3<sub>20-494</sub>-Actin-SFG. α helices and β strands are  
 94 numbered and rainbow-colored from the N to C terminus. SET domain and Rubisco LSMT  
 95 binding domain are shaded blue and pink, respectively. Actin peptide- and SFG-binding sites  
 96 are denoted as light pink and yellow boxes, respectively.

97 **b** Topology diagram of ternary complex SETD2-H3K36M-SAH. α helices and β strands are  
 98 numbered and rainbow-colored from the N to C terminus. H3K36M peptide- and SAH-binding  
 99 sites are shaded light pink and yellow, respectively.

100

101

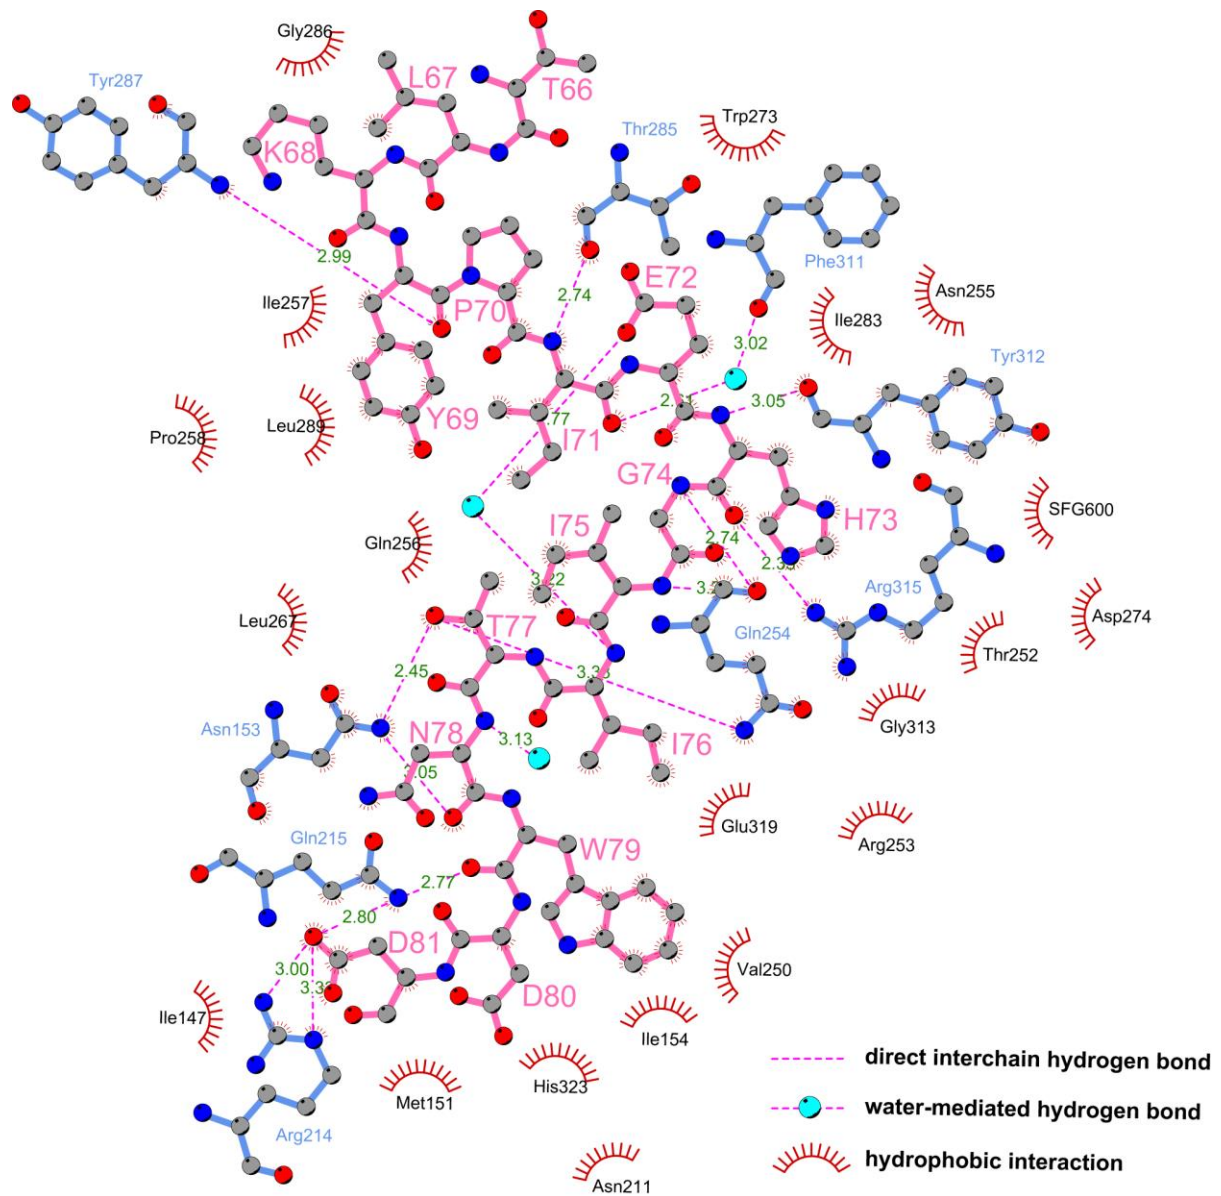

102

103 **Supplementary Fig. S3 Binding details between SETD3 and actin peptide.**

104 LIGPLOT diagram listing critical interactions between the actin peptide (66-81) and SETD3.

105 Actin peptide (pink) and key residues of SETD3 (light blue) are depicted in a *ball-and-stick*

106 model. *Gray sphere*, carbon; *Blue sphere*, nitrogen; *red sphere*, oxygen; *cyan sphere*, water

107 molecule.



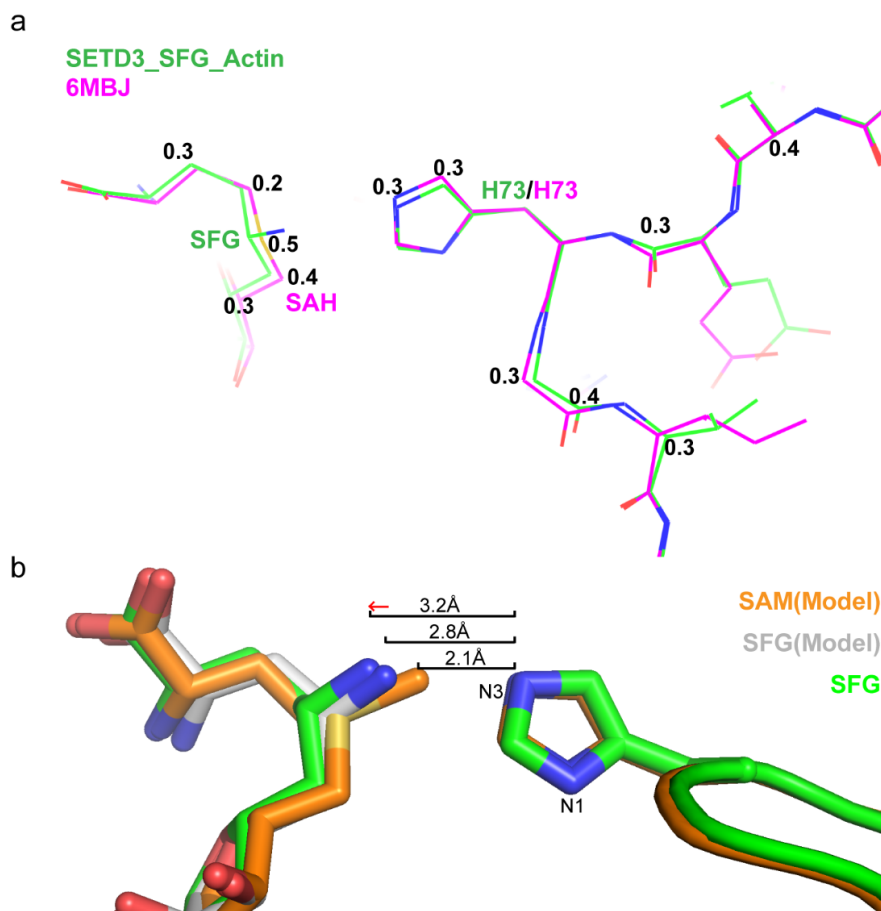

108

109 **Supplementary Fig. S4 Steric constraints introduced by SFG/SAM binding**

110 **a** Structural superposition of the “SETD3-SFG-actin” ternary complex (green) and “SETD3-  
 111 SAH-actin” ternary complex (purple, PDB code: 6MBJ). Numbers are measured distances  
 112 between the counterpart atoms of the two complexes in the unit of Å. Note the global outer  
 113 shift of both SFG and actin peptide in the SETD3-SFG-actin complex.

114 **b** Structural superposition of SAM model, SFG model and SFG based on 6MBJ. Numbers  
 115 are measured distances between N3 atom of histidine and CH<sub>3</sub> in SAM, or NH<sub>2</sub> in SFG(model  
 116 and real structure). The red arrow shows outer shift of SFG between model and real structure.

117

118

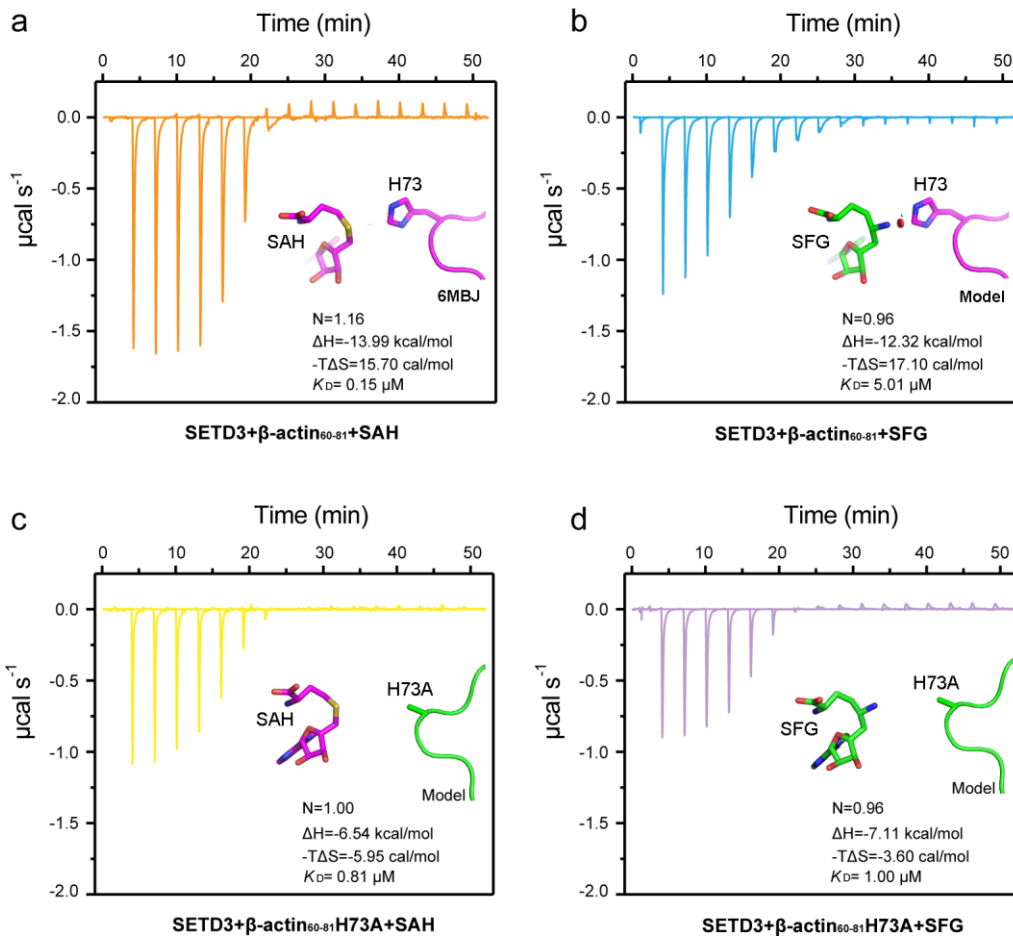

119

120 **Supplementary Fig. S5 ITC titration curves of SETD3 titrated with wild type  $\beta$ -actin**

121 **peptide (a, b) or H73A mutant peptide (c, d) in the presence of SAH or SFG. All the**

122 **models were generated based on the SETD3-SAH-actin ternary complex (PDB: 6MBJ).**

123 **Red and green discs shown in panel b denote steric clashes.**
